# Supplementary material for: Genomic and small RNA sequencing of Miscanthus × giganteus shows the utility of sorghum as a reference genome sequence for Andropogoneae grasses
Source: PubMed Central journal article supplement (PMC2872872; doi:10.1186/gb-2010-11-2-r12), 2010-02-03
Supplement: gb-2010-11-2-r12-S1.pdf [file gb-2010-11-2-r12-S1.pdf]

| Sample name               | Sample ID | Sample<br>G0+G1 mean | Standard (int.)<br>G0+G1 mean | DNA content<br>(pg/2 or 3C) | St. Dev<br>± |
|---------------------------|-----------|----------------------|-------------------------------|-----------------------------|--------------|
| Miscanthus x giganteus    | <b>#1</b> | 596.44               | 189.16                        | 7.88                        |              |
| <i>UIUC</i>               |           | 655.38               | 206.20                        | 7.95                        |              |
|                           |           | 719.43               | 227.62                        | 7.90                        |              |
|                           |           | 757.07               | 249.11                        | 7.60                        |              |
|                           |           |                      |                               | <b>7.83</b>                 | <b>0.158</b> |
|                           |           |                      | <b>Mbp/1C</b>                 | <b>3837.69</b>              | <b>77.62</b> |
| Miscanthus sinensis       | <b>#3</b> | 549.69               | 185.04                        | 7.43                        |              |
| Autumn Light              |           | 605.02               | 202.17                        | 7.48                        |              |
|                           |           | 664.57               | 216.53                        | 7.67                        |              |
|                           |           | 730.25               | 236.90                        | 7.71                        |              |
|                           |           |                      |                               | <b>7.57</b>                 | <b>0.138</b> |
|                           |           |                      | <b>Mbp/1C</b>                 | <b>3837.69</b>              | <b>77.62</b> |
| Miscanthus sinensis       | <b>#4</b> | 448.87               | 198.20                        | 5.66                        |              |
| Silberfeder               |           | 494.05               | 215.74                        | 5.73                        |              |
|                           |           | 539.15               | 239.17                        | 5.64                        |              |
|                           |           | 591.37               | 265.38                        | 5.57                        |              |
|                           |           |                      |                               | <b>5.65</b>                 | <b>0.064</b> |
|                           |           |                      | <b>Mbp/1C</b>                 | <b>3837.69</b>              | <b>77.62</b> |
| Miscanthus sacchariflorus | <b>#5</b> | 415.82               | 186.92                        | 5.56                        |              |
| Amur Silver Grass         |           | 459.96               | 204.18                        | 5.63                        |              |
|                           |           | 505.01               | 216.65                        | 5.83                        |              |
|                           |           | 555.26               | 234.46                        | 5.92                        |              |
|                           |           |                      |                               | <b>5.74</b>                 | <b>0.167</b> |
|                           |           |                      | <b>Mbp/1C</b>                 | <b>3837.69</b>              | <b>77.62</b> |
| Miscanthus sacchariflorus | <b>#6</b> | 364.11               | 201.34                        | 4.52                        |              |
| Blue Stem Nursery         |           | 399.98               | 221.10                        | 4.52                        |              |
|                           |           | 437.21               | 246.29                        | 4.44                        |              |
|                           |           | 479.04               | 272.92                        | 4.39                        |              |
|                           |           |                      |                               | <b>4.47</b>                 | <b>0.066</b> |
|                           |           |                      | <b>Mbp/1C</b>                 | <b>3837.69</b>              | <b>77.62</b> |

1 pg= 980 mbp
