# Supplementary material for: Genomic and small RNA sequencing of Miscanthus × giganteus shows the utility of sorghum as a reference genome sequence for Andropogoneae grasses
Source: PubMed Central journal article supplement (PMC2872872; doi:10.1186/gb-2010-11-2-r12), 2010-02-03
Supplement: gb-2010-11-2-r12-S2.pdf [file gb-2010-11-2-r12-S2.pdf]

# Supplemental Figure 1

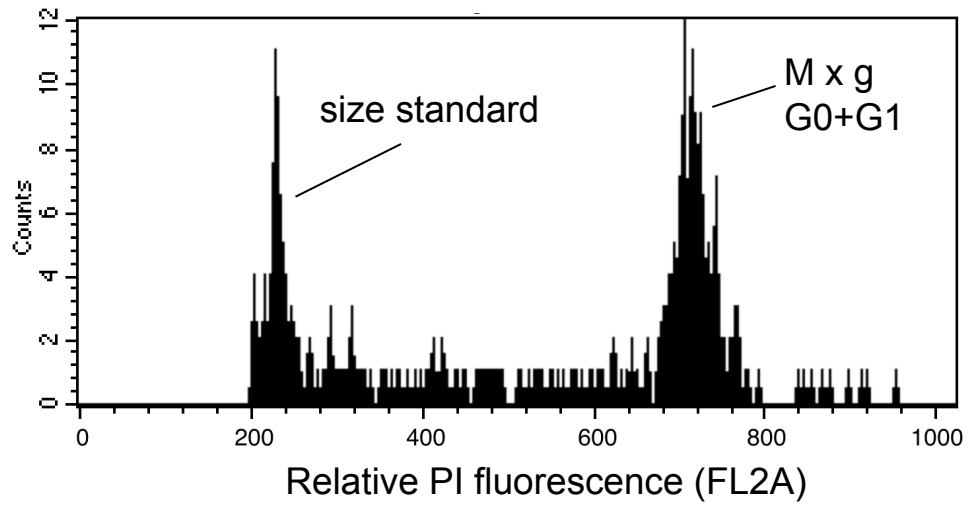

Supplemental Figure 1: Flow cytometric histogram of *M. x giganteus* nuclei stained with Propidium Iodide
